# Supplementary material
Source: PubMed Central journal article supplement (PMC3421649)

Supplemental Figure 1

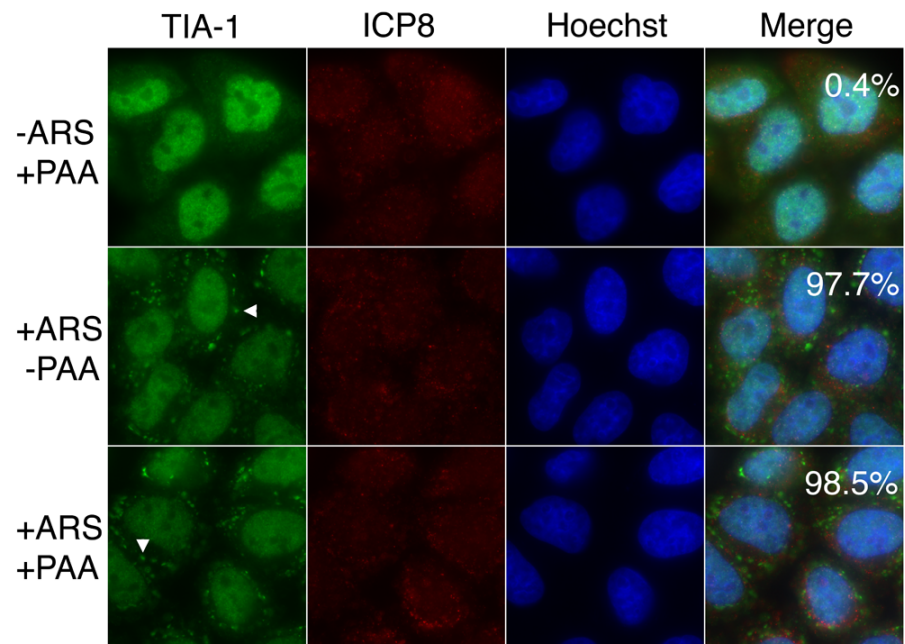

Supplemental Figure 2

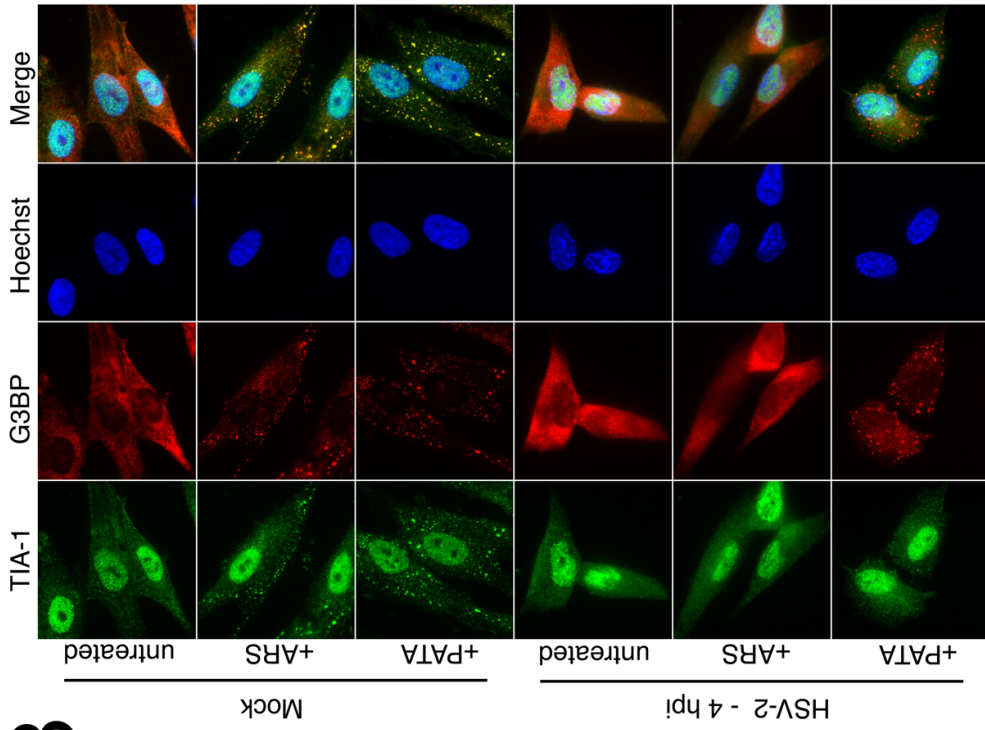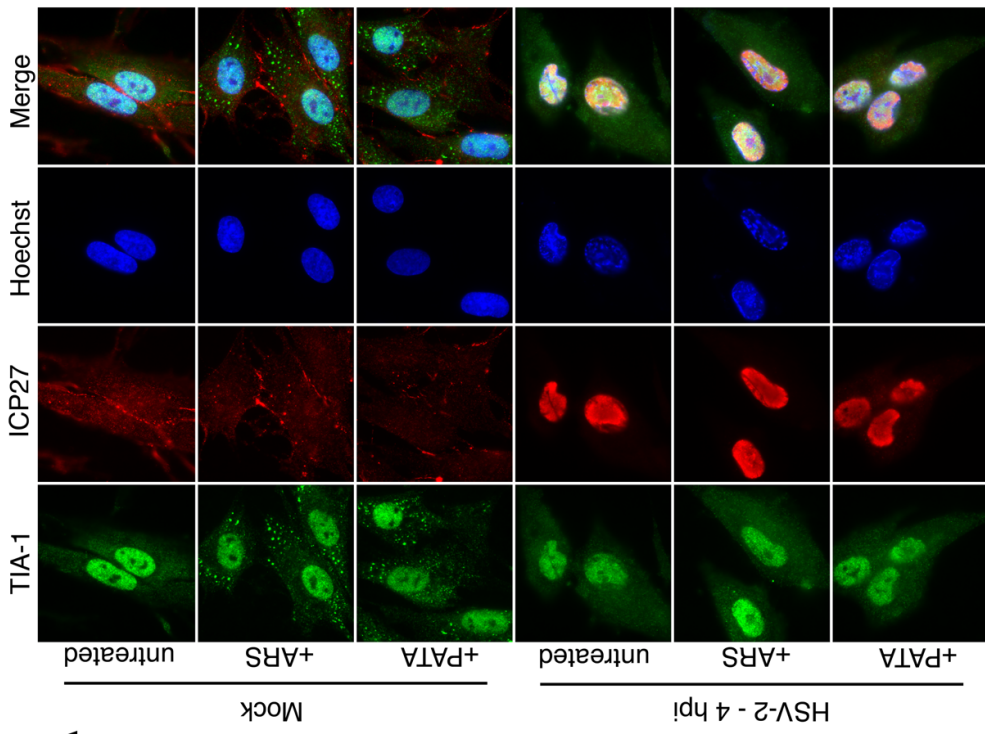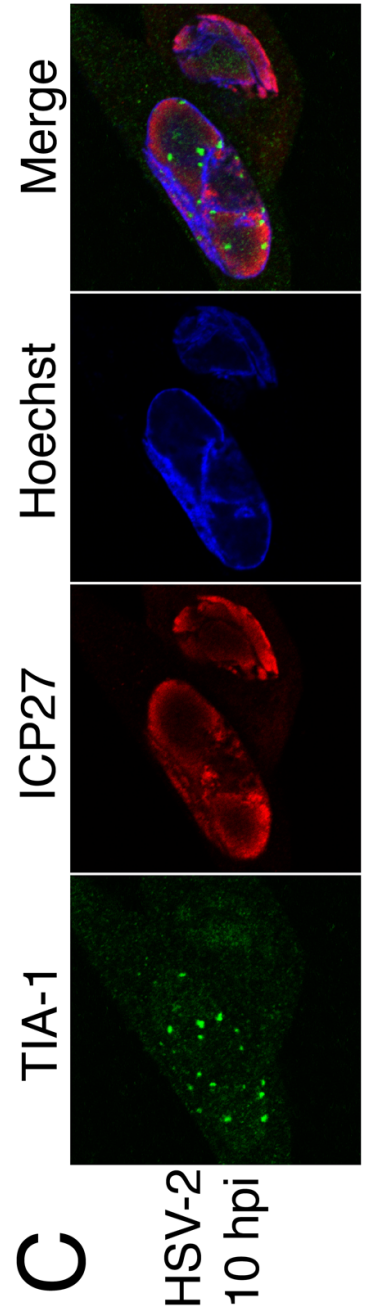

Supplemental Figure 3

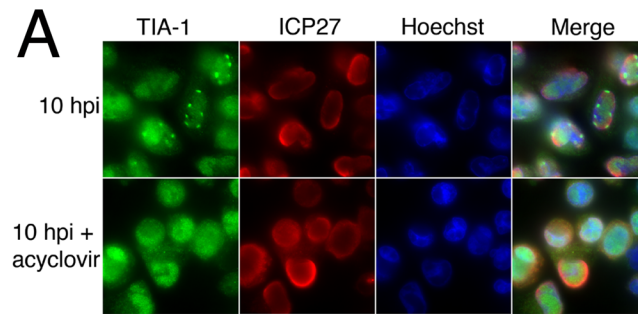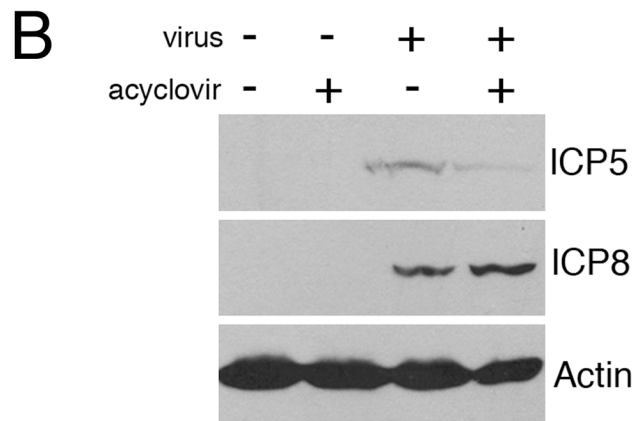

Supplemental Figure 4

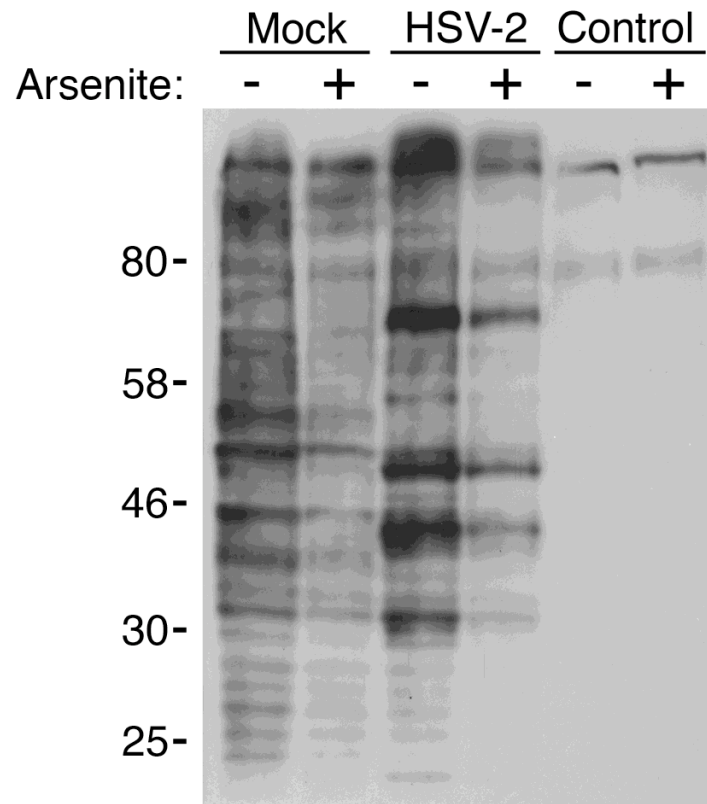

Supplemental Figure 5

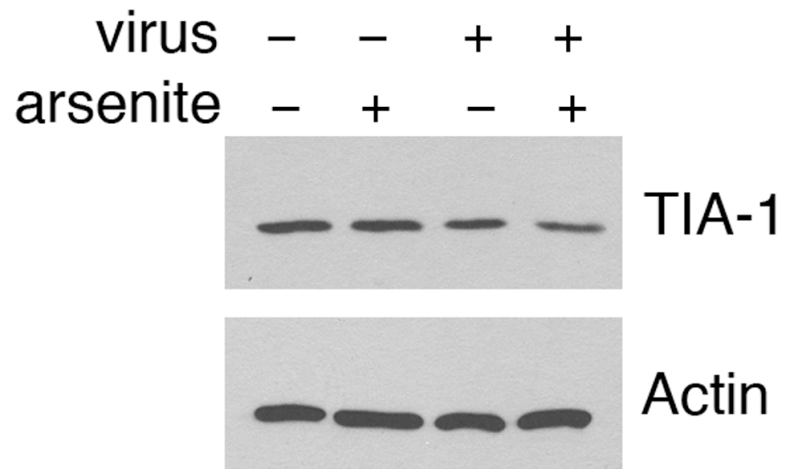

Supplement: JVI.00313-12_zjv999096275so2.pdf [file JVI.00313-12_zjv999096275so2.pdf]
